# Supplementary material for: Toeing the Party Line: Indexicality and Regional Andalusian Phonetic Features in Political Speech
Source: MDPI journal article supplement (doi:10.3390/languages8030196), 2023-08-16
Supplement: s1 [file s1]

Table S1: Speaker and video identification

| Name                                         | Sex    | City    | Party | Context   | Birth<br>Year | Age | Video<br>Year | Duration | Link                                                                                                                      |
|----------------------------------------------|--------|---------|-------|-----------|---------------|-----|---------------|----------|---------------------------------------------------------------------------------------------------------------------------|
| Pedro Sanchez<br>Pérez-Castejón              | Male   | Madrid  | PSOE  | Discourse | 1972          | 46  | 2018          | 27.5     | <a href="https://www.youtube.com/watch?v=6ENJeX6k5eA">https://www.youtube.com/watch?v=6ENJeX6k5eA</a>                     |
|                                              |        |         |       | Female    |               | 44  | 2016          | 18.5     | <a href="https://www.youtube.com/watch?v=jw27qkZPjeg">https://www.youtube.com/watch?v=jw27qkZPjeg</a>                     |
|                                              |        |         |       | Male      |               | 46  | 2018          | 21       | <a href="https://www.youtube.com/watch?v=EBa9mGjtyS0">https://www.youtube.com/watch?v=EBa9mGjtyS0</a>                     |
| Manuel Robles<br>Delgado                     | Male   | Madrid  | PSOE  | Discourse | 1953          | 65  | 2018          | 20.5     | <a href="https://www.youtube.com/watch?v=7yHWOVbV-o0">https://www.youtube.com/watch?v=7yHWOVbV-o0</a>                     |
|                                              |        |         |       | Female    |               | 58  | 2011          | 20       | <a href="https://www.youtube.com/watch?v=OVp_NR9Rjcw">https://www.youtube.com/watch?v=OVp_NR9Rjcw</a>                     |
|                                              |        |         |       | Male      |               | 64  | 2017          | 24       | <a href="https://www.youtube.com/watch?v=Ew5khvOvUP8">https://www.youtube.com/watch?v=Ew5khvOvUP8</a>                     |
| Maria Cristina<br>Narbona Ruiz               | Female | Madrid  | PSOE  | Discourse | 1951          | 66  | 2017          | 28.5     | <a href="https://www.youtube.com/watch?v=L4ifC-AwOyU">https://www.youtube.com/watch?v=L4ifC-AwOyU</a>                     |
|                                              |        |         |       | Female    |               | 66  | 2017          | 24.5     | <a href="https://www.youtube.com/watch?v=ovMfZvkj_28">https://www.youtube.com/watch?v=ovMfZvkj_28</a>                     |
|                                              |        |         |       | Male      |               | 67  | 2018          | 28.5     | <a href="https://www.youtube.com/watch?v=Z_iHUu7L9mI">https://www.youtube.com/watch?v=Z_iHUu7L9mI</a>                     |
| María Elena<br>Valenciano<br>Martínez-Orozco | Female | Madrid  | PSOE  | Discourse | 1960          | 53  | 2013          | 23       | <a href="https://www.youtube.com/watch?v=rKkI4yHBLfA">https://www.youtube.com/watch?v=rKkI4yHBLfA</a>                     |
|                                              |        |         |       | Female    |               | 58  | 2018          | 28.5     | <a href="https://www.youtube.com/watch?v=AkvY0RMQIWws">https://www.youtube.com/watch?v=AkvY0RMQIWws</a>                   |
|                                              |        |         |       | Male      |               | 53  | 2013          | 11.5     | <a href="https://www.youtube.com/watch?v=lo0hLWlbKmc&amp;t=56s">https://www.youtube.com/watch?v=lo0hLWlbKmc&amp;t=56s</a> |
| José Antonio Pérez<br>Tapias                 | Male   | Seville | PSOE  | Discourse | 1955          | 59  | 2014          | 15       | <a href="https://www.youtube.com/watch?v=CBdTKonS8X0">https://www.youtube.com/watch?v=CBdTKonS8X0</a>                     |
|                                              |        |         |       | Female    |               | 59  | 2014          | 9.5      | <a href="https://www.youtube.com/watch?v=TaP7ovmZ0Ek">https://www.youtube.com/watch?v=TaP7ovmZ0Ek</a>                     |
|                                              |        |         |       | Male      |               | 59  | 2014          | 11       | <a href="https://www.youtube.com/watch?v=iKRbZq41thA">https://www.youtube.com/watch?v=iKRbZq41thA</a>                     |
| Antonio Pradas<br>Torres                     | Male   | Seville | PSOE  | Discourse | 1963          | 52  | 2015          | 26.5     | <a href="https://www.youtube.com/watch?v=seehz0qor0A">https://www.youtube.com/watch?v=seehz0qor0A</a>                     |
|                                              |        |         |       | Female    |               | 53  | 2016          | 13.5     | <a href="https://www.youtube.com/watch?v=a5-UtfCaZLc">https://www.youtube.com/watch?v=a5-UtfCaZLc</a>                     |
|                                              |        |         |       | Male      |               | 53  | 2016          | 31.5     | <a href="https://www.youtube.com/watch?v=yka_-qeirLg">https://www.youtube.com/watch?v=yka_-qeirLg</a>                     |
| Susana Díaz<br>Pacheco                       | Female | Seville | PSOE  | Discourse | 1974          | 41  | 2015          | 23.5     | <a href="https://www.youtube.com/watch?v=rhoqg3lK3Qc">https://www.youtube.com/watch?v=rhoqg3lK3Qc</a>                     |
|                                              |        |         |       | Female    |               | 44  | 2018          | 27       | <a href="https://www.youtube.com/watch?v=Rta6Q1v1uAM">https://www.youtube.com/watch?v=Rta6Q1v1uAM</a>                     |
|                                              |        |         |       | Male      |               | 43  | 2017          | 34.5     | <a href="https://www.youtube.com/watch?v=TcoY8tWJpTc">https://www.youtube.com/watch?v=TcoY8tWJpTc</a>                     |
| Verónica Pérez<br>Fernández                  | Female | Seville | PSOE  | Discourse | 1978          | 37  | 2015          | 20       | <a href="https://www.youtube.com/watch?v=0mEyr_EqWuM">https://www.youtube.com/watch?v=0mEyr_EqWuM</a>                     |
|                                              |        |         |       | Female    |               | 35  | 2013          | 21.5     | <a href="https://www.youtube.com/watch?v=2xBg7zCuYig">https://www.youtube.com/watch?v=2xBg7zCuYig</a>                     |
|                                              |        |         |       | Male      |               | 39  | 2017          | 34.5     | <a href="https://www.youtube.com/watch?v=NmE_BDSIZCo">https://www.youtube.com/watch?v=NmE_BDSIZCo</a>                     |
| Francisco Javier<br>Arenas Vacas             | Male   | Córdoba | PSOE  | Discourse | 1957          | 56  | 2013          | 14       | <a href="https://www.youtube.com/watch?v=IVtuqqHeuGY">https://www.youtube.com/watch?v=IVtuqqHeuGY</a>                     |
|                                              |        |         |       | Male      |               | 57  | 2014          | 33.5     | <a href="https://www.youtube.com/watch?v=4YJ4ZVVh9as">https://www.youtube.com/watch?v=4YJ4ZVVh9as</a>                     |
| Antonio Ruiz Cruz                            | Male   | Córdoba | PSOE  | Discourse | 1970          | 46  | 2016          | 36       | <a href="https://www.youtube.com/watch?v=UdwT3-1BhtQ">https://www.youtube.com/watch?v=UdwT3-1BhtQ</a>                     |
|                                              |        |         |       | Female    |               | 46  | 2016          | 21       | <a href="https://www.youtube.com/watch?v=4S0tsbfz22o">https://www.youtube.com/watch?v=4S0tsbfz22o</a>                     |
|                                              |        |         |       | Male      |               | 48  | 2018          | 4        | <a href="https://www.youtube.com/watch?v=WypduqgigIM">https://www.youtube.com/watch?v=WypduqgigIM</a>                     |
| María del Carmen<br>Calvo Poyato             | Female | Córdoba | PSOE  | Discourse | 1957          | 61  | 2018          | 32       | <a href="https://www.youtube.com/watch?v=Ovb8siYeByk">https://www.youtube.com/watch?v=Ovb8siYeByk</a>                     |
|                                              |        |         |       | Female    |               | 61  | 2018          | 34.5     | <a href="https://www.youtube.com/watch?v=KNiMJYt56AY">https://www.youtube.com/watch?v=KNiMJYt56AY</a>                     |
|                                              |        |         |       | Male      |               | 61  | 2018          | 11.5     | <a href="https://www.youtube.com/watch?v=QQoeO9F56hY">https://www.youtube.com/watch?v=QQoeO9F56hY</a>                     |
|                                              | Female | Córdoba | PSOE  | Discourse | 1970          | 46  | 2016          | 37       | <a href="https://www.youtube.com/watch?v=TYE6dQwBcFk">https://www.youtube.com/watch?v=TYE6dQwBcFk</a>                     |

|                                      |        |         |    |                  |      |    |      |      |                                                                                                                                                                                                                                                                           |
|--------------------------------------|--------|---------|----|------------------|------|----|------|------|---------------------------------------------------------------------------------------------------------------------------------------------------------------------------------------------------------------------------------------------------------------------------|
| María Isabel Ambrosio Palos          |        |         |    | <u>Female</u>    |      | 47 | 2017 | 14.5 | <a href="https://www.youtube.com/watch?v=safGsU2uFE4">https://www.youtube.com/watch?v=safGsU2uFE4</a>                                                                                                                                                                     |
|                                      |        |         |    | Male             |      | 48 | 2018 | 26.5 | <a href="https://www.youtube.com/watch?v=QdZaQCOSi8U">https://www.youtube.com/watch?v=QdZaQCOSi8U</a>                                                                                                                                                                     |
| Pío García-Escudero Márquez          | Male   | Madrid  | PP | <u>Discourse</u> | 1952 | 61 | 2013 | 12   | <a href="https://www.youtube.com/watch?v=hwwM8JEGGKY">https://www.youtube.com/watch?v=hwwM8JEGGKY</a>                                                                                                                                                                     |
|                                      |        |         |    | <u>Female</u>    |      | 59 | 2011 | 10.5 | <a href="https://www.youtube.com/watch?v=gevRa6Jddhw">https://www.youtube.com/watch?v=gevRa6Jddhw</a>                                                                                                                                                                     |
|                                      |        |         |    | Male             |      | 59 | 2011 | 9.5  | <a href="https://www.youtube.com/watch?v=Zfr3e4rRLUs">https://www.youtube.com/watch?v=Zfr3e4rRLUs</a>                                                                                                                                                                     |
|                                      |        |         |    | <u>Discourse</u> |      | 54 | 2018 | 31   | <a href="https://www.youtube.com/watch?v=EL54ryAt6uo">https://www.youtube.com/watch?v=EL54ryAt6uo</a>                                                                                                                                                                     |
| Ángel Garrido García                 | Male   | Madrid  | PP | <u>Female</u>    | 1964 | 54 | 2018 | 21   | <a href="https://www.antena3.com/noticias/entrevista-completa-angel-garrido-espejo-publico-video_201811155bed329f0cf2e828bc6554fb.html">https://www.antena3.com/noticias/entrevista-completa-angel-garrido-espejo-publico-video_201811155bed329f0cf2e828bc6554fb.html</a> |
|                                      |        |         |    | Male             |      | 54 | 2018 | 13   | <a href="https://www.youtube.com/watch?v=ahqJy-337aw">https://www.youtube.com/watch?v=ahqJy-337aw</a>                                                                                                                                                                     |
|                                      |        |         |    | <u>Discourse</u> |      | 53 | 2017 | 29   | <a href="https://www.youtube.com/watch?v=7fxdup3vGqE">https://www.youtube.com/watch?v=7fxdup3vGqE</a>                                                                                                                                                                     |
| María Cristina Cifuentes Cuencas     | Female | Madrid  | PP | <u>Female</u>    | 1964 | 52 | 2016 | 35   | <a href="https://www.youtube.com/watch?v=POWGqn5zDV4">https://www.youtube.com/watch?v=POWGqn5zDV4</a>                                                                                                                                                                     |
|                                      |        |         |    | Male             |      | 53 | 2017 | 42.5 | <a href="https://www.youtube.com/watch?v=srC4f-gcQjU">https://www.youtube.com/watch?v=srC4f-gcQjU</a>                                                                                                                                                                     |
|                                      |        |         |    | <u>Discourse</u> |      | 63 | 2015 | 24   | <a href="https://www.youtube.com/watch?v=JmSorHjp760">https://www.youtube.com/watch?v=JmSorHjp760</a>                                                                                                                                                                     |
| Esperanza Aguirre y Gil de Biedma    | Female | Madrid  | PP | <u>Female</u>    | 1952 | 63 | 2015 | 38.5 | <a href="https://www.youtube.com/watch?v=DBGoR_xKRPg">https://www.youtube.com/watch?v=DBGoR_xKRPg</a>                                                                                                                                                                     |
|                                      |        |         |    | Male             |      | 66 | 2018 | 29   | <a href="https://www.youtube.com/watch?v=2vQm1IadpRk">https://www.youtube.com/watch?v=2vQm1IadpRk</a>                                                                                                                                                                     |
|                                      |        |         |    | <u>Discourse</u> |      | 48 | 2018 | 28   | <a href="https://www.youtube.com/watch?v=UCwcxvqvubk">https://www.youtube.com/watch?v=UCwcxvqvubk</a>                                                                                                                                                                     |
| Juan Manuel Moreno Bonilla           | Male   | Seville | PP | <u>Female</u>    | 1970 | 47 | 2017 | 25   | <a href="https://www.youtube.com/watch?v=8MaMTAj174E">https://www.youtube.com/watch?v=8MaMTAj174E</a>                                                                                                                                                                     |
|                                      |        |         |    | Male             |      | 47 | 2017 | 16   | <a href="https://www.youtube.com/watch?v=_vzJM5UrwDQ">https://www.youtube.com/watch?v=_vzJM5UrwDQ</a>                                                                                                                                                                     |
|                                      |        |         |    | <u>Discourse</u> |      | 60 | 2017 | 41.5 | <a href="https://www.youtube.com/watch?v=5E-OQ2Vis3o">https://www.youtube.com/watch?v=5E-OQ2Vis3o</a>                                                                                                                                                                     |
| Juan Ignacio Zoido Álvarez           | Male   | Seville | PP | <u>Female</u>    | 1957 | 60 | 2017 | 22   | <a href="https://www.youtube.com/watch?v=096u7Py15DM">https://www.youtube.com/watch?v=096u7Py15DM</a>                                                                                                                                                                     |
|                                      |        |         |    | Male             |      | 60 | 2017 | 47   | <a href="https://www.youtube.com/watch?v=1z6wBdpYz8Q">https://www.youtube.com/watch?v=1z6wBdpYz8Q</a>                                                                                                                                                                     |
|                                      |        |         |    | <u>Discourse</u> |      | 55 | 2016 | 17   | <a href="https://www.youtube.com/watch?v=WrvqV6Ic4ay4">https://www.youtube.com/watch?v=WrvqV6Ic4ay4</a>                                                                                                                                                                   |
| María Teresa Jiménez-Becerril Barrio | Female | Seville | PP | <u>Female</u>    | 1961 | 53 | 2014 | 4    | <a href="https://www.youtube.com/watch?v=th-d4CwJUcU">https://www.youtube.com/watch?v=th-d4CwJUcU</a>                                                                                                                                                                     |
|                                      |        |         |    | Male             |      | 55 | 2016 | 20   | <a href="https://www.youtube.com/watch?v=pIPMwbPJPGI">https://www.youtube.com/watch?v=pIPMwbPJPGI</a>                                                                                                                                                                     |
|                                      |        |         |    | <u>Discourse</u> |      | 55 | 2012 | 27.5 | <a href="https://www.youtube.com/watch?v=cooJMrfkWz0">https://www.youtube.com/watch?v=cooJMrfkWz0</a>                                                                                                                                                                     |
| María Esperanza Oña Sevilla          | Female | Seville | PP | <u>Female</u>    | 1957 | 61 | 2018 | 30.5 | <a href="https://www.youtube.com/watch?v=JDsJvE7ZijY">https://www.youtube.com/watch?v=JDsJvE7ZijY</a>                                                                                                                                                                     |
|                                      |        |         |    | Male             |      | 59 | 2016 | 31   | <a href="https://www.youtube.com/watch?v=vfsdYRIOWzY">https://www.youtube.com/watch?v=vfsdYRIOWzY</a>                                                                                                                                                                     |
|                                      |        |         |    | <u>Discourse</u> |      | 47 | 2017 | 29.5 | <a href="https://www.youtube.com/watch?v=B8fW-hfCCQU">https://www.youtube.com/watch?v=B8fW-hfCCQU</a>                                                                                                                                                                     |
| José Antonio Nieto Ballesteros       | Male   | Córdoba | PP | <u>Female</u>    | 1970 | 45 | 2015 | 42.5 | <a href="https://www.youtube.com/watch?v=icrS6yTu0wU">https://www.youtube.com/watch?v=icrS6yTu0wU</a>                                                                                                                                                                     |
|                                      |        |         |    | Male             |      | 45 | 2015 | 36   | <a href="https://www.youtube.com/watch?v=tD6F73S2L_I">https://www.youtube.com/watch?v=tD6F73S2L_I</a>                                                                                                                                                                     |
|                                      |        |         |    | <u>Discourse</u> |      | 40 | 2015 | 6    | <a href="https://www.youtube.com/watch?v=YRrVBMQqFGw">https://www.youtube.com/watch?v=YRrVBMQqFGw</a>                                                                                                                                                                     |
| Adolfo Manuel Molina Rascón          | Male   | Córdoba | PP | <u>Female</u>    | 1975 | 42 | 2017 | 17.5 | <a href="https://www.youtube.com/watch?v=UU5R4-7Tsxw">https://www.youtube.com/watch?v=UU5R4-7Tsxw</a>                                                                                                                                                                     |
|                                      |        |         |    | Male             |      | 40 | 2015 | 19   | <a href="https://www.youtube.com/watch?v=Yrkd6WPaaW">https://www.youtube.com/watch?v=Yrkd6WPaaW</a>                                                                                                                                                                       |
|                                      |        |         |    | <u>Discourse</u> |      | 46 | 2014 | 2.5  | <a href="https://www.youtube.com/watch?v=IHx7cTRvGBg">https://www.youtube.com/watch?v=IHx7cTRvGBg</a>                                                                                                                                                                     |
| María Luisa Ceballos Casas           | Female | Córdoba | PP | <u>Female</u>    | 1968 | 43 | 2011 | 13   | <a href="https://www.youtube.com/watch?v=Y5c0d5WS7ho">https://www.youtube.com/watch?v=Y5c0d5WS7ho</a>                                                                                                                                                                     |
|                                      |        |         |    | Male             |      | 47 | 2015 | 10   | <a href="https://www.youtube.com/watch?v=sbyh3VZPjy8">https://www.youtube.com/watch?v=sbyh3VZPjy8</a>                                                                                                                                                                     |

|                                    |        |         |      |           |      |    |      |      |                                                                                                                   |
|------------------------------------|--------|---------|------|-----------|------|----|------|------|-------------------------------------------------------------------------------------------------------------------|
| María Beatriz Jurado Fernández     | Female | Córdoba | PP   | Discourse | 1983 | 34 | 2017 | 10.5 | <a href="https://www.youtube.com/watch?v=oKujFXC5rCk">https://www.youtube.com/watch?v=oKujFXC5rCk</a>             |
|                                    |        |         |      | Female    |      | 34 | 2017 | 13   | <a href="https://www.youtube.com/watch?v=bkE3KggB9-8">https://www.youtube.com/watch?v=bkE3KggB9-8</a>             |
|                                    |        |         |      | Male      |      | 33 | 2016 | 25.5 | <a href="https://www.youtube.com/watch?v=nUFzMZPRV0w">https://www.youtube.com/watch?v=nUFzMZPRV0w</a>             |
| José Luis Ruiz Espejo              | Male   | Málaga  | PSOE | Discourse | 1965 | 53 | 2018 | 11   | <a href="https://www.youtube.com/watch?v=Y1Aov90moiI">https://www.youtube.com/watch?v=Y1Aov90moiI</a>             |
|                                    |        |         |      | Female    |      | 53 | 2018 | 28.5 | <a href="https://www.youtube.com/watch?v=N0FEHwRJcvs">https://www.youtube.com/watch?v=N0FEHwRJcvs</a>             |
|                                    |        |         |      | Male      |      | 53 | 2018 | 41.5 | <a href="https://www.youtube.com/watch?v=6imGfx82G7M">https://www.youtube.com/watch?v=6imGfx82G7M</a>             |
| José Bernal Gutiérrez              | Male   | Málaga  | PSOE | Discourse | 1974 | 43 | 2017 | 13.5 | <a href="https://www.youtube.com/watch?v=_YtWH2j3ihI">https://www.youtube.com/watch?v=_YtWH2j3ihI</a>             |
|                                    |        |         |      | Female    |      | 43 | 2017 | 22   | <a href="https://www.youtube.com/watch?v=E_oNkT3S8qk">https://www.youtube.com/watch?v=E_oNkT3S8qk</a>             |
|                                    |        |         |      | Male      |      | 45 | 2019 | 29   | <a href="https://www.youtube.com/watch?v=5e3WrX2AD5g">https://www.youtube.com/watch?v=5e3WrX2AD5g</a>             |
| Fuensanta Lima Cid                 | Female | Málaga  | PSOE | Discourse | 1962 | 49 | 2011 | 14.5 | <a href="https://www.youtube.com/watch?v=eTSdYolcGHE">https://www.youtube.com/watch?v=eTSdYolcGHE</a>             |
|                                    |        |         |      | Female    |      | 52 | 2014 | 9.5  | <a href="https://www.youtube.com/watch?v=D2f2pdeJAJQ">https://www.youtube.com/watch?v=D2f2pdeJAJQ</a>             |
| Patricia Alba Luque                | Female | Málaga  | PSOE | Discourse | 1980 | 37 | 2017 | 27   | <a href="https://www.youtube.com/watch?v=i-IGpZA_2Bk">https://www.youtube.com/watch?v=i-IGpZA_2Bk</a>             |
|                                    |        |         |      | Female    |      | 38 | 2018 | 5.5  | <a href="https://www.youtube.com/watch?v=MVoqerhzVWk">https://www.youtube.com/watch?v=MVoqerhzVWk</a>             |
|                                    |        |         |      | Male      |      | 33 | 2013 | 49   | <a href="https://www.youtube.com/watch?v=sutmW0zGE3A">https://www.youtube.com/watch?v=sutmW0zGE3A</a>             |
| Elías Bendodo Benasayag            | Male   | Málaga  | PP   | Discourse | 1974 | 45 | 2019 | 42   | <a href="https://www.youtube.com/watch?v=d-vNllkJxpg">https://www.youtube.com/watch?v=d-vNllkJxpg</a>             |
|                                    |        |         |      | Female    |      | 41 | 2015 | 14   | <a href="https://www.youtube.com/watch?v=Fejbc6JcMjU">https://www.youtube.com/watch?v=Fejbc6JcMjU</a>             |
|                                    |        |         |      | Male      |      | 43 | 2017 | 13.5 | <a href="https://www.youtube.com/watch?v=fcXPpaQs8E0">https://www.youtube.com/watch?v=fcXPpaQs8E0</a>             |
| José Francisco Salado Escaño       | Male   | Málaga  | PP   | Discourse | 1965 | 54 | 2019 | 22.5 | <a href="https://www.youtube.com/watch?v=X21egU0cXEs">https://www.youtube.com/watch?v=X21egU0cXEs</a>             |
|                                    |        |         |      | Female    |      | 53 | 2018 | 9    | <a href="https://www.youtube.com/watch?v=zjW6qf-yOII">https://www.youtube.com/watch?v=zjW6qf-yOII</a>             |
|                                    |        |         |      | Male      |      | 46 | 2011 | 30.5 | <a href="https://www.youtube.com/watch?v=v5sVOsmxJjQ">https://www.youtube.com/watch?v=v5sVOsmxJjQ</a>             |
| Celia Villalobos Talero            | Female | Málaga  | PP   | Discourse | 1949 | 62 | 2011 | 28.5 | <a href="https://www.youtube.com/watch?v=SyDn9dWQwDo">https://www.youtube.com/watch?v=SyDn9dWQwDo</a>             |
|                                    |        |         |      | Female    |      | 67 | 2016 | 24   | <a href="https://www.youtube.com/watch?v=g3PUzdpr3Bw">https://www.youtube.com/watch?v=g3PUzdpr3Bw</a>             |
|                                    |        |         |      | Male      |      | 69 | 2018 | 26   | <a href="https://www.youtube.com/watch?v=bsAt2lEwb5E">https://www.youtube.com/watch?v=bsAt2lEwb5E</a>             |
| Margarita del Carmen del Cid Muñoz | Female | Málaga  | PP   | Discourse | 1973 | 46 | 2019 | 6.5  | <a href="https://www.youtube.com/watch?v=HpI8TpEyzY">https://www.youtube.com/watch?v=HpI8TpEyzY</a>               |
|                                    |        |         |      | Female    |      | 43 | 2016 | 7.5  | <a href="https://www.facebook.com/watch/?v=589571151242922">https://www.facebook.com/watch/?v=589571151242922</a> |
|                                    |        |         |      | Male      |      | 46 | 2019 | 32.5 | <a href="https://www.youtube.com/watch?v=C-UJ-7wEkJ4">https://www.youtube.com/watch?v=C-UJ-7wEkJ4</a>             |
